# Supplementary material for: Sequence dependence of isothermal DNA amplification via EXPAR
Source: PubMed Central journal article supplement — Nucleic Acids Res. 2012 Mar 13;40(11):e87. doi: 10.1093/nar/gks230 (PMC3367216; doi:10.1093/nar/gks230), 2012-03-13
Supplement: supp_gks230_nar-02942-met-h-2011-File012.pdf [file supp_gks230_nar-02942-met-h-2011-File012.pdf]

# Sequence Dependence of Isothermal DNA Amplification via EXPAR

## Supplementary Data

### SUPPLEMENTARY METHODS:

**EXPAR template design – thermodynamic criteria:** We calculated the melting temperature ( $T_M$ ) values for template/trigger and template/template hybridization and determined the number of bonds involved in template-template self-hybridization via the Zuker-Turner algorithm(55), through the UNAFold application(55), using as input parameters a DNA type set to oligo, a temperature of 55 °C, with a DNA concentration of 0.05  $\mu$ M, and cation concentrations of  $[\text{Na}^+]$  at 1M,  $[\text{Mg}^{2+}]$  at 0 M, which although different from the electrolyte type and concentration used in EXPAR (30mM  $[\text{K}^+]$ , 3 mM  $[\text{Mg}^{2+}]$ ) yields good agreement between experimental and calculated data (Supplementary Results Figure S2). The trigger/template  $T_M$  was calculated based on predicted  $\Delta H$  and  $\Delta S$  values and the concentration of the EXPAR template present in the reaction, using equation (1), which is valid if one strand (here the template) is present in excess in the reaction.

$$T_M = \frac{\Delta H^0}{\Delta S^0 - R \ln[\text{template}]} \quad (1)$$

By contrast, the  $T_M$  for template/template self-hybridization was calculated using equation (2) implemented in UNAFold, which assumes that the total DNA concentration represents both strands present in equal concentration.

$$T_M = \frac{\Delta H^0}{\Delta S^0 - R \ln([\text{DNA}]/4)} \quad (2)$$

**Data Analysis:** To analyze the EXPAR real-time fluorescence amplification curves, we developed a MATLAB program called EXPAR Data Analysis Tool (EDAT), which performs a nonlinear least-squares curve fit of the real-time fluorescence data to a sigmoidal hyperbolic tangent (tanh) function given by:

$$y_{fit}(t) = y_{min} + 0.5 * \Delta y * \left[ 1 + \tanh\left(\frac{t-t_0}{\tau}\right) \right] \quad (3)$$

Here,  $y_{fit}$  is the fitted value of normalized fluorescence at each time point  $t$ . There are four fitting parameters:  $y_{min}$  is a normalized baseline value;  $\Delta y$  is a multiplicative scaling factor;  $t_0$  denotes the point of inflection (POI); and  $\tau$  is a measure of steepness of the sigmoidal function near the POI. Prior to fitting the above function, the raw fluorescence data is normalized to range from 0 to 1 by defining:

$$\hat{R} = (R - R_{min}) / (R_{max} - R_{min}). \quad (4)$$

Here,  $\hat{R}$  is the normalized data while  $R$  is the raw fluorescence measurement.  $R_{min}$  and  $R_{max}$  are the minimum and maximum values of the measured fluorescence. Our least squares curve fit method uses the “trust-region-reflective” algorithm (65), to find the parameters  $t_0$ ,  $\tau$ ,  $y_{min}$  and  $\Delta y$  that provide the best fit by the function (3) to the normalized data (5), over the entire set of discrete times  $t$ .

For each curve, EDAT determines and records the time required for the fitted data to reach 10% and 90% of the maximum plateau, designated as P10 and P90 for positive, trigger containing reactions, and N10 and N90 for negative, no trigger controls. The program also records the quality of data fitting (resnorm). Curves with no apparent amplification and curves for which the fluorescence intensity only started to increase above background at the very end of the amplification time were classified as “No Amplification” (NA) and “Late Amplification” (LA), respectively (Supplementary Results Figure S1A and B), and were not evaluated further.

Likewise, curves for which the amplification is clearly non-sigmoidal were classified as “Non-Sigmoidal” (NS, Supplementary Results Figure S1C), and were not further evaluated. If a curve amplified in a sigmoidal fashion and nearly reached the final plateau at the end of experiment (Supplementary Results Figure S1D), then we padded the curve at the end with the last detected fluorescence intensity value, which provides a reasonable approximation of the actual value. These curves were designated as “Fit-with-padding.” Some curves have a dip in fluorescence intensity in the first minute of amplification related to instrument performance. For these curves, the initial inconsistent data was replaced with the fluorescence intensity at an operator selected “cut time”, and the curves were designated as “cutting start” (Supplementary Results Figure S1F). Likewise, for some curves the fluorescence intensity continues to increase or decrease slightly (Supplementary Results Figure S1E). Some templates further exhibit a second exponential rise, likely due to “ab initio” DNA synthesis as previously reported (54), which is not the process of interest herein. Since both phenomena distort the curve fit of the initial sigmoidal rise, the data following a given operator selected “cut time” (selected ~ 5 minutes after the first sigmoidal curve has reached the plateau) was replaced with the fluorescence intensity at the cut time, and the curves were designated as “cutting end”.

#### **Position Weight Matrix classification method:**

The PWMs for low P90 and large positive Diff were constructed as follows: The first PWM was generated based on templates in the training set whose P90 was in the lowest 30% of the P90 value range. The second PWM was generated using templates in the training set whose Diff was in the highest 40% of the Diff value range. In each case, for the 14 variable positions within the EXPAR template sequence, we defined the probability to find any of the four nucleotides at position  $n$  as  $p_i^{(n)}$ , where  $n$  is the position index ( $1 < n < 14$ ), and  $i$  is the nucleotide index ( $0 < i < 3$ ).

$p_0^{(n)}$  denoted the highest probability for any  $p_i^{(n)}$  occurring in position  $n$ . Then, the "energies" for the position  $n$  were defined as:

$$\varepsilon_i^{(n)} = \ln \frac{p_0^{(n)}}{p_i^{(n)}} \quad (5)$$

The resulting position weight matrix  $\varepsilon_i^{(n)}$  consists of 4 rows for the 4 nucleotides, and 14 columns for the 14 variable positions within the template. We then applied these two position weight matrices to calculate scores for all other template sequences. First, we generated a sequence matrix  $S_i^{(n)}$ , where  $n$  is the position index, and  $i$  is the nucleotide index, as before. If position  $n$  contains the nucleotide with index  $i$ , then  $S_i^{(n)}=1$ , otherwise  $S_i^{(n)}=0$ .

The P90 and Diff scores of sequence  $s$  are then calculated according to:

$$E(s) = \sum_{n=1}^{14} \sum_{i=0}^3 \varepsilon_i^{(n)} S_i^{(n)} \quad (6)$$

### SUPPLEMENTARY RESULTS:

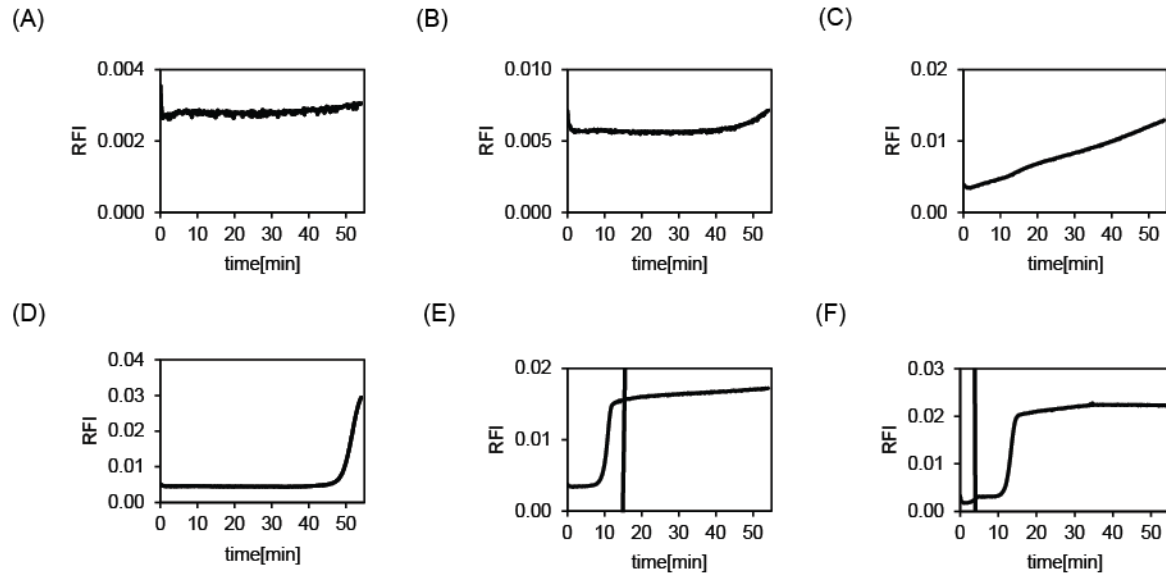

**Figure S1:** Examples of non-conventional curves: (A) No amplification (B) Late amplification (C) Non sigmoidal (D) Fit with padding (E) Fit with cutting end (E) Fit with cutting start

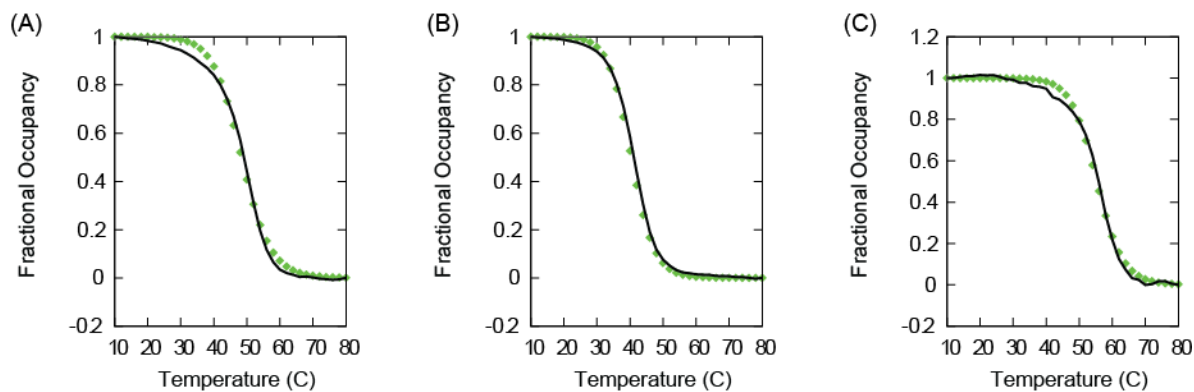

**Figure S2:** Demonstration of reasonable agreement between calculated and experimentally determined trigger-template  $T_M$  values and melting curves for three selected EXPAR template / trigger pairs: (A) Seq ID # 1, (B) Seq ID # 35, and (C) Seq ID # 21. Experimental melting curves (dotted green line) were determined on a Bio-Rad Opticon I thermocycler in EXPAR buffer, using 50 nM 5' FAM labeled trigger and 500 nM 3' BHQ labeled template. Calculated melting curves (solid black line) and  $T_M$  values are based on  $\Delta H$  and  $\Delta S$  values predicted via the Zuker-Turner algorithm(55), through the UNAFold application (55).

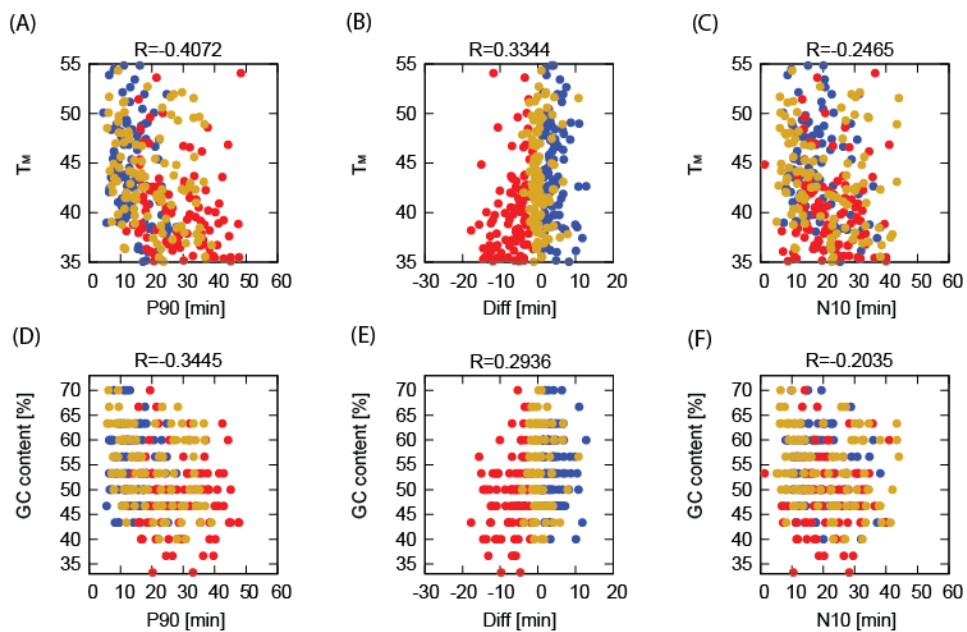

**Figure S3.** Plots and Spearman correlation coefficients  $R$  for (A)-(C) the trigger-template melting temperature versus P90, Diff, and N10, and (D)-(F) the template GC content versus P90, Diff, and N10. Blue: well performing class I templates; red: poorly performing class II templates; orange: class III templates with intermediate performance.

**Table S1: Template Sequences, Thermodynamic Parameters, and Performance Metrics**

| ID # | Template Sequence               | T <sub>M</sub> 1 | T <sub>M</sub> 2 | # Bonds | Results  | P90  | N10  | Diff  |
|------|---------------------------------|------------------|------------------|---------|----------|------|------|-------|
| 1    | CCTACGACTGAACAGACTCTCCTACGACTG  | 43               | 15               | 6       | CI       | 12.6 | 16.6 | 4.0   |
| 2    | CCTACGACTTAACAGACTCTCCTACGACTT  | 39               | -25              | 2       | CI       | 16.3 | 21.4 | 5.1   |
| 3    | CCTACGACGGAACAGACTCTCCTACGACGG  | 48               | -25              | 2       | CI       | 15.4 | 16.5 | 1.2   |
| 4    | CCTACGAGTGAACAGACTCTCCTACGAGTG  | 43               | -25              | 2       | CIII     | 17.8 | 17.8 | 0.1   |
| 5    | CCTACGGCTGAACAGACTCTCCTACGGCTG  | 48               | 2                | 6       | CIII     | 12.5 | 12.0 | -0.5  |
| 6    | CCTACTACTGAACAGACTCTCCTACTACTG  | 36               | 15               | 6       | CI       | 18.8 | 23.8 | 5.0   |
| 7    | CCTAGGACTGAACAGACTCTCCTAGGACTG  | 41               | 45               | 20      | NR,CE    | 0.0  | 0.0  | 0.0   |
| 8    | CCTGCGACTGAACAGACTCTCCTGCGACTG  | 49               | 15               | 6       | CI       | 11.9 | 13.2 | 1.3   |
| 9    | CCAACGACTGAACAGACTCTCCAACGACTG  | 45               | 15               | 6       | CIII     | 24.0 | 27.7 | 3.7   |
| 10   | CGTACGACTGAACAGACTCTCGTACGACTG  | 44               | 49               | 20      | NR,LA,NA | 0.0  | 0.0  | 0.0   |
| 11   | GCTACGACTGAACAGACTCTGCTACGACTG  | 44               | 15               | 6       | NR,CE    | 0.0  | 0.0  | 0.0   |
| 12   | CCTGTGCATCCCTAGACTCTCCTGTGCATC  | 42               | -12              | 4       | CIII     | 7.6  | 8.0  | 0.5   |
| 13   | GGGGAAATAGGTGAGACTCTGGGGAAATAG  | 36               | 9                | 6       | CI       | 15.5 | 16.8 | 1.3   |
| 14   | GCTACCTTCAACTCGACTCTGCTACCTTCA  | 40               | -41              | 2       | CIII     | 18.7 | 19.1 | 0.4   |
| 15   | TGGCGTGAAAACGGACTCTTGGCGTGAAA   | 44               | -27              | 3       | CI       | 11.4 | 14.0 | 2.6   |
| 16   | GGAGGAGATGCACAGACTCTGGAGGAGATG  | 40               | 14               | 8       | CII      | 18.0 | 13.8 | -4.1  |
| 17   | GCACATGGATGTTTGACTCTGCACATGGAT  | 41               | -2               | 8       | CIII     | 23.0 | 24.6 | 1.6   |
| 18   | CTTGTGCTGGTGGCGACTCTCTTGTGCTGG  | 44               | -34              | 2       | CI       | 7.6  | 9.0  | 1.4   |
| 19   | GACCCGTCTACGGCGACTCTGACCCGTCTA  | 45               | 23               | 4       | CIII     | 21.0 | 20.0 | -1.0  |
| 20   | ATCCACCCCTGACGGACTCTATCCACCCCT  | 45               | -35              | 3       | CIII     | 14.4 | 14.2 | -0.3  |
| 21   | CCCCCGCACTGGTGGACTCTCCCCCGCACT  | 54               | 15               | 8       | SD       | 0.0  | 0.0  | 0.0   |
| 22   | AGTATGCGAAGAGCGACTCTAGTATGCGAA  | 40               | 4                | 8       | CII      | 33.9 | 30.6 | -3.3  |
| 23   | TTGGACACCAGTTCGACTCTTTGGACACCA  | 41               | -40              | 3       | CI       | 9.2  | 10.3 | 1.0   |
| 24   | CAATGAGGTCTAGCGACTCTCAATGAGGTC  | 35               | 19               | 8       | CII,LA   | 37.4 | 22.9 | -14.5 |
| 25   | TCATGGTGTGCGAAGACTCTTCATGGTGTG  | 36               | 27               | 10      | CIII     | 11.1 | 10.8 | -0.3  |
| 26   | ACATCGTCTGCGGCGACTCTACATCGTCTG  | 41               | 19               | 4       | CIII     | 23.1 | 26.3 | 3.2   |
| 27   | AGCGTGCAGCGTGGGACTCTAGCGTGCAGC  | 53               | 1                | 6       | SD       | 0.0  | 0.0  | 0.0   |
| 28   | CTCCAGGACCCTGCGACTCTCTCCAGGACC  | 45               | 21               | 8       | SD       | 0.0  | 0.0  | 0.0   |
| 29   | CTTGGCACCCTCCGGGACTCTCTTGGCACC  | 45               | 5                | 4       | CI       | 9.2  | 12.5 | 3.4   |
| 30   | CCGTGGCAACCGACGACTCTCCGTGGCAAC  | 49               | -26              | 3       | CIII     | 28.3 | 27.2 | -1.1  |
| 31   | ACGTGTGGGCGGCGGACTCTACGTGTGGGC  | 51               | 15               | 4       | CI       | 13.0 | 19.4 | 6.4   |
| 32   | TAGCACCATGTAAAGACTCTTAGCACCATG  | 42               | -2               | 8       | CIII     | 11.9 | 8.2  | -3.7  |
| 33   | AGTGGGTAATTCCGCGACTCTAGTGGGTAAT | 35               | 16               | 4       | CII      | 20.7 | 8.7  | -12.0 |
| 34   | CGTTTGGCACTTGTGACTCTCGTTTGGCAC  | 46               | 12               | 6       | NA,LA,NS | 0.0  | 0.0  | 0.0   |
| 35   | GATGGTCATTCCGAGACTCTGATGGTCATT  | 35               | -81              | 8       | CII      | 28.5 | 24.9 | -3.7  |
| 36   | GACGCAGCCCCGTGGACTCTGACGCAGCCC  | 53               | -14              | 6       | CI       | 13.1 | 20.7 | 7.6   |
| 37   | GCCTAGGCCGGGCTGACTCTGCCTAGGCCG  | 51               | 54               | 22      | NA       | 0.0  | 0.0  | 0.0   |
| 38   | TCTTGCCCGTCCGACTCTTCTTGCCCGT    | 49               | 24               | 8       | CI       | 12.0 | 15.4 | 3.4   |
| 39   | GGTGGCAGCGATAAGACTCTGGTGGCAGCG  | 55               | 12               | 8       | CIII     | 14.4 | 12.5 | -1.9  |

T<sub>M</sub>1: template-trigger T<sub>M</sub> in °C; T<sub>M</sub>2: template-template T<sub>M</sub> in °C; # bonds: number of bonds for template self hybridization. T<sub>M</sub> values and # of bonds determined via the program UnaFold. Results: summary of data analysis and classification results; CI: Class I, well performing; CII: Class II, poorly performing; CIII: Class III, intermediate performance. NR: sequence excluded because not enough replicates of decent quality; CE: Cut End; SD: sequence excluded because standard deviation in P90 or DIFF > 30% of the mean. Additional annotation for sequences with some / all replicates outside of the "normal" expected sigmoidal response. LA: Late Amplification; NA: No Amplification; NS: Non-Sigmoidal. For the 307 sequences with qualified data analysis, P90, N10, and Diff values are listed in minutes.

**Table S1: Template Sequences, Thermodynamic Parameters, and Performance Metrics**

| ID # | Template Sequence                 | T <sub>M</sub> 1 | T <sub>M</sub> 2 | # Bonds | Results | P90  | N10  | DIFF  |
|------|-----------------------------------|------------------|------------------|---------|---------|------|------|-------|
| 40   | CTGGGCTATTGTTAGACTCTCTGGGCTATT    | 39               | -71              | 2       | CI      | 5.5  | 7.4  | 1.9   |
| 41   | CGTCTAAAGCGGAAGACTCTCGTCTAAAGC    | 39               | -19              | 4       | SD,LA   | 0.0  | 0.0  | 0.0   |
| 42   | GCCGAGGCTGGATTGACTCTGCCGAGGCTG    | 52               | 20               | 6       | NA      | 0.0  | 0.0  | 0.0   |
| 43   | TACCCTAGGCGCCAGACTCTTACCCTAGGC    | 42               | 39               | 6       | CII     | 31.9 | 21.8 | -10.1 |
| 44   | GGGTGCGGTGCACGGACTCTGGGTGCGGTG    | 53               | 34               | 12      | CIII    | 18.7 | 19.0 | 0.3   |
| 45   | ATGACTCAACCGATGACTCTATGACTCAAC    | 37               | -40              | 2       | NA      | 0.0  | 0.0  | 0.0   |
| 46   | AGCGTACCCAAGTACTCTAGCGTACCCA      | 47               | -3               | 4       | CIII    | 22.5 | 26.1 | 3.6   |
| 47   | GGGGAGCACTGTGAGACTCTGGGGAGCACT    | 49               | 20               | 6       | CIII    | 5.7  | 6.1  | 0.4   |
| 48   | CCCCAATAGGTGAGACTCTCCCCAATAG      | 40               | 25               | 10      | CIII    | 14.3 | 12.1 | -2.2  |
| 49   | GGGGAAAATAGGTGGACTCTGGGGAAAATAG   | 36               | -42              | 5       | CII     | 18.3 | 16.9 | -1.3  |
| 50   | GGGGAGCACTGGTGGACTCTGGGGAGCACT    | 49               | 15               | 8       | NR,CE   | 0.0  | 0.0  | 0.0   |
| 51   | CCCCAATAGGTGGACTCTCCCCAATAG       | 40               | 8                | 8       | CIII    | 11.3 | 10.4 | -0.9  |
| 52   | CCCCCGCACTGTGAGACTCTCCCCCGCACT    | 54               | 20               | 6       | CI      | 7.9  | 9.8  | 1.9   |
| 53   | GGGGAAGGTTCGTGAGACTCTGGGGAAGGTC   | 44               | 9                | 6       | CIII    | 12.8 | 12.7 | -0.1  |
| 54   | CAATGAATAGGTGAGACTCTCAATGAATAG    | 29               | 16               | 10      | NA      | 0.0  | 0.0  | 0.0   |
| 55   | GGGGAAAATAGTAGCGACTCTGGGGAAAATAG  | 36               | 11               | 8       | CIII    | 22.8 | 22.5 | -0.4  |
| 56   | GGGGAAGGTCTAGCGACTCTGGGGAAGGTC    | 44               | -34              | 2       | CIII    | 6.6  | 6.5  | -0.1  |
| 57   | GCACAAATAGGTGAGACTCTGCACAAATAG    | 35               | -15              | 3       | CII,LA  | 47.8 | 39.9 | -7.9  |
| 58   | GCACATGGATGTGAGACTCTGCACATGGAT    | 41               | 34               | 10      | CII     | 32.0 | 26.9 | -5.1  |
| 59   | GGGGAGCTGGGTGAGACTCTGGGGAGCTGG    | 50               | -19              | 4       | CIII    | 6.1  | 6.3  | 0.2   |
| 60   | GGGGAGCTGGTGGCGACTCTGGGGAGCTGG    | 50               | -19              | 4       | CI      | 4.6  | 7.2  | 2.7   |
| 61   | CTTGTAATAGTGCGCACTCTCTTGTAATAG    | 28               | 13               | 8       | NA      | 0.0  | 0.0  | 0.0   |
| 62   | CCTACGACTGAACAGACTCCCCTACGACTG    | 43               | 15               | 6       | SD      | 0.0  | 0.0  | 0.0   |
| 63   | CCTACGACTGGGAAGACTCTCCTACGACTG    | 41               | -25              | 2       | CII     | 22.5 | 18.5 | -4.0  |
| 64   | CCTACGACTGAACAGACTCTCCTACGACTGCTC | 45               | 15               | 6       | CII,NS  | 16.2 | 1.2  | -15.0 |
| 65   | CCCACGGATTAGCCGACTCTCCCACGGATT    | 46               | -4               | 3       | NR,CE   | 0.0  | 0.0  | 0.0   |
| 66   | GCTCCTCGACGATGGACTCTGCTCCTCGAC    | 47               | -3               | 4       | CII     | 32.1 | 28.3 | -3.8  |
| 67   | GTCAACGTCGCGCGACTCTGTCAACGTCG     | 45               | 18               | 4       | LA,NS   | 0.0  | 0.0  | 0.0   |
| 68   | GAATGTTCGGTTTAAGACTCTGAATGTTCGGT  | 38               | -116             | 2       | CI      | 15.7 | 17.5 | 1.8   |
| 69   | CTGTCCGGCGAGACGACTCTCTGTCCGGCG    | 54               | 17               | 4       | SD      | 0.0  | 0.0  | 0.0   |
| 70   | GCAGCCTTCCTGACGACTCTGCAGCCTTCC    | 48               | 17               | 6       | CIII    | 9.4  | 9.4  | 0.0   |
| 71   | AGTCTCTCTGTATGGACTCTAGTCTCTCTG    | 38               | -15              | 4       | CIII    | 30.3 | 30.1 | -0.2  |
| 72   | ACTAAGCTTATTGCGACTCTACTAAGCTTA    | 35               | 17               | 6       | NA,NS   | 0.0  | 0.0  | 0.0   |
| 73   | TTCCCTGGGACATTGACTCTTTCCCTGGGA    | 41               | -46              | 2       | CII     | 24.5 | 17.3 | -7.2  |
| 74   | CCCCCCCCAAGAATGGACTCTCCCCCCCCAAG  | 52               | -37              | 3       | CIII    | 6.4  | 6.2  | -0.1  |
| 75   | GACATAGGTGTGGAGACTCTGACATAGGTG    | 37               | -28              | 6       | CII,LA  | 25.3 | 22.3 | -3.0  |
| 76   | TGGGGGCCAAACGCGACTCTTGGGGGCCAA    | 51               | 22               | 4       | NA,NS   | 0.0  | 0.0  | 0.0   |
| 77   | TGTCGCACCTTGAGGACTCTTGTCGCACCT    | 48               | 15               | 8       | CI      | 10.0 | 11.5 | 1.5   |
| 78   | CTTCTGTGCCGGGCGACTCTCTTCTGTGCC    | 43               | 20               | 8       | CIII    | 8.9  | 8.3  | -0.6  |

T<sub>M</sub>1: template-trigger T<sub>M</sub> in °C; T<sub>M</sub>2: template-template T<sub>M</sub> in °C; # bonds: number of bonds for template self hybridization. T<sub>M</sub> values and # of bonds determined via the program UnaFold. Results: summary of data analysis and classification results; CI: Class I, well performing; CII: Class II, poorly performing; CIII: Class III, intermediate performance. NR: sequence excluded because not enough replicates of decent quality; CE: Cut End; SD: sequence excluded because standard deviation in P90 or DIFF > 30% of the mean. Additional annotation for sequences with some / all replicates outside of the "normal" expected sigmoidal response. LA: Late Amplification; NA: No Amplification; NS: Non-Sigmoidal. For the 307 sequences with qualified data analysis, P90, N10, and Diff values are listed in minutes.



**Table S1: Template Sequences, Thermodynamic Parameters, and Performance Metrics**

| ID # | Template Sequence                | T <sub>M</sub> 1 | T <sub>M</sub> 2 | # Bonds | Results   | P90  | N10  | DIFF  |
|------|----------------------------------|------------------|------------------|---------|-----------|------|------|-------|
| 79   | TATCGAGAGGCCCGACTCTTATCGAGAGG    | 39               | 1                | 4       | CII       | 36.8 | 21.2 | -15.6 |
| 80   | CTGACCAGTTTGTGATGACTCTCTGACCAGTT | 39               | -162             | 3       | NR,CE     | 0.0  | 0.0  | 0.0   |
| 81   | AGCCTATCTGTACCGACTCTAGCCTATCTG   | 39               | -40              | 2       | CIII      | 14.5 | 14.1 | -0.4  |
| 82   | CCATCATTGTCTGGACTCTCCATCATTG     | 35               | 14               | 8       | CIII      | 23.6 | 22.6 | -1.1  |
| 83   | GCGATGCGAGGCGGGACTCTGCGATGCGAG   | 50               | -34              | 2       | CII       | 19.4 | 14.1 | -5.3  |
| 84   | CTGAAGCCATAGTAGACTCTCTGAAGCCAT   | 41               | -68              | 3       | SD        | 0.0  | 0.0  | 0.0   |
| 85   | CACAATAGGAAATTGACTCTCACAATAGGA   | 36               | -19              | 4       | CII,NA    | 39.6 | 26.6 | -13.1 |
| 86   | TGCTTGGGTTTTCGACTCTTGCTTGGGTT    | 42               | -41              | 2       | CI        | 6.5  | 8.1  | 1.7   |
| 87   | ATGACATACGAACCGACTCTATGACATACG   | 38               | -25              | 2       | CII,NA,LA | 44.6 | 32.0 | -12.7 |
| 88   | GACACCTATGTTGTGACTCTGACACCTATG   | 37               | -18              | 3       | CII       | 28.1 | 24.5 | -3.6  |
| 89   | GGCATTTATGCGGGACTCTGGCATTATG     | 35               | 17               | 8       | CII       | 21.9 | 10.9 | -11.0 |
| 90   | AGCGTCACGACATCGACTCTAGCGTCACGA   | 50               | 7                | 6       | CII       | 23.5 | 20.6 | -2.9  |
| 91   | TTCAAACGAAACCGACTCTTTCAAACGGA    | 39               | -1               | 3       | CII,LA    | 47.5 | 39.5 | -7.9  |
| 92   | GGAAGACTCTTAGCGACTCTGGAAGACTCT   | 37               | -34              | 2       | CII       | 40.8 | 28.0 | -12.8 |
| 93   | CCACGACTCCGGTTGACTCTCCACGACTCC   | 46               | 5                | 4       | CI        | 15.4 | 22.2 | 6.8   |
| 94   | GCAGCACTACCGGGACTCTGCAGCACTAC    | 44               | 17               | 6       | CII,LA    | 42.5 | 35.7 | -6.8  |
| 95   | CTGACCTGTTAGGCGACTCTCTGACCTGTT   | 39               | -10              | 6       | CI        | 11.4 | 14.4 | 2.9   |
| 96   | CCCATTCCACGCATGACTCTCCATTCCAC    | 42               | -3               | 4       | NA,LA     | 0.0  | 0.0  | 0.0   |
| 97   | TGCGAGTGGAGCGGGACTCTTGCGAGTGGA   | 47               | -15              | 4       | CIII      | 12.6 | 11.0 | -1.6  |
| 98   | CCTCTAAGGTATCAGACTCTCCTCTAAGGT   | 37               | -62              | 3       | NR,CE     | 0.0  | 0.0  | 0.0   |
| 99   | CGCGTATTGATCGTGACTCTCGCGTATTGA   | 44               | 11               | 4       | CII       | 33.4 | 26.3 | -7.1  |
| 100  | TGGGCACTCCAGGGACTCTTGGGCACTCC    | 50               | -8               | 8       | CIII      | 9.4  | 7.7  | -1.6  |
| 101  | TAGTGGTGTATAGTGACTCTTAGTGGTGTGTA | 38               | -18              | 6       | CII       | 17.0 | 11.9 | -5.1  |
| 102  | TGATACCGAAGGTGGACTCTTGATACCGAA   | 35               | -40              | 2       | CII,LA    | 40.0 | 36.3 | -3.7  |
| 103  | AAGTCTCCGTTTCAGACTCTAAGTCTCCGT   | 41               | -43              | 5       | CIII      | 34.0 | 33.7 | -0.3  |
| 104  | CCCGCCTTCCCCGAGACTCTCCCGCCTTCC   | 52               | -40              | 2       | CIII      | 25.9 | 30.3 | 4.4   |
| 105  | CGCAATCTTTCATGACTCTCGCAATCTCT    | 41               | -7               | 4       | CI        | 12.9 | 14.4 | 1.6   |
| 106  | TCTTGTGGAGAAATGACTCTTCTTGTGGAG   | 42               | -18              | 3       | CII       | 22.8 | 16.1 | -6.7  |
| 107  | TAGTGCATTTTACAGACTCTTAGTGCATTT   | 36               | -27              | 6       | NA,LA     | 0.0  | 0.0  | 0.0   |
| 108  | CTATTCTGCCAATGACTCTCTATTCTGCC    | 38               | 15               | 6       | CII       | 16.4 | 14.7 | -1.7  |
| 109  | TCGCTTCATAGCTGGACTCTTCGCTTCATA   | 40               | -3               | 4       | CII       | 32.0 | 25.6 | -6.5  |
| 110  | CCTGGATGAAGCCTGACTCTCCTGGATGAA   | 39               | -4               | 4       | CII       | 31.2 | 23.5 | -7.6  |
| 111  | ATCCGGCATAAGGGACTCTATCCGGCAT     | 44               | -4               | 4       | NA,LA     | 0.0  | 0.0  | 0.0   |
| 112  | AGTTGTTCTGATGGACTCTAGTTGTTCTT    | 38               | -88              | 3       | CII       | 18.4 | 14.0 | -4.4  |
| 113  | CTACAAGCAAAGCTGACTCTCTACAAGCAA   | 37               | -26              | 4       | CIII,LA   | 38.9 | 38.5 | -0.5  |
| 114  | GGCTGCAAAGTACTGACTCTGGCTGCAAAG   | 45               | 2                | 6       | CIII      | 16.8 | 16.7 | -0.1  |
| 115  | CCTAGTGGGCTTATGACTCTCCTAGTGGGC   | 45               | -64              | 3       | NR,CE     | 0.0  | 0.0  | 0.0   |
| 116  | AAGCCCTACAAGAGACTCTAAGCCCTCAC    | 46               | 17               | 8       | CII       | 36.0 | 34.6 | -1.4  |
| 117  | GCGATAACACAACCGACTCTGCGATAACAC   | 41               | -34              | 2       | CI        | 19.1 | 22.5 | 3.4   |

T<sub>M</sub>1: template-trigger T<sub>M</sub> in °C; T<sub>M</sub>2: template-template T<sub>M</sub> in °C; # bonds: number of bonds for template self hybridization. T<sub>M</sub> values and # of bonds determined via the program UnaFold. Results: summary of data analysis and classification results; CI: Class I, well performing; CII: Class II, poorly performing; CIII: Class III, intermediate performance. NR: sequence excluded because not enough replicates of decent quality; CE: Cut End; SD: sequence excluded because standard deviation in P90 or DIFF > 30% of the mean. Additional annotation for sequences with some / all replicates outside of the "normal" expected sigmoidal response. LA: Late Amplification; NA: No Amplification; NS: Non-Sigmoidal. For the 307 sequences with qualified data analysis, P90, N10, and Diff values are listed in minutes.

**Table S1: Template Sequences, Thermodynamic Parameters, and Performance Metrics**

| ID # | Template Sequence               | T <sub>M</sub> 1 | T <sub>M</sub> 2 | # Bonds | Results | P90  | N10  | DIFF  |
|------|---------------------------------|------------------|------------------|---------|---------|------|------|-------|
| 118  | CGGTCTAATGGTGAGACTCTCGGTCTAATG  | 38               | -15              | 4       | CII     | 35.8 | 33.5 | -2.4  |
| 119  | GGACCGTACTCCACGACTCTGGACCGTACT  | 42               | -34              | 3       | CII,LA  | 37.1 | 32.6 | -4.5  |
| 120  | AACGATGGACGACCGACTCTAACGATGGAC  | 38               | -25              | 2       | CI      | 20.3 | 27.5 | 7.2   |
| 121  | CAGCGGGTTGCCCTGACTCTCAGCGGGTTG  | 49               | -29              | 4       | NR,CE   | 0.0  | 0.0  | 0.0   |
| 122  | ATACAGGTGCTTTTGACTCTATACAGGTGC  | 39               | -30              | 2       | CI      | 9.4  | 11.2 | 1.8   |
| 123  | CGTAACGGTCGGTGGACTCTCGTAACGGTC  | 42               | 6                | 6       | CIII,LA | 30.5 | 30.1 | -0.4  |
| 124  | CGGTAAGAACCCTCGACTCTCGGTAAGAAC  | 38               | -41              | 2       | NA,LA   | 0.0  | 0.0  | 0.0   |
| 125  | TGCTATGAGACGCGGACTCTTGCTATGAGA  | 36               | 18               | 4       | CII     | 38.2 | 24.7 | -13.5 |
| 126  | GAAGCTGAACTACGGACTCTGAAGCTGAAC  | 37               | -26              | 4       | CII     | 36.2 | 33.4 | -2.8  |
| 127  | CCAGCGCAGCCTGGGACTCTCCAGCGCAGC  | 54               | 18               | 4       | SD      | 0.0  | 0.0  | 0.0   |
| 128  | CGGAGACACCACTCGACTCTCGGAGACACC  | 47               | 14               | 6       | CIII    | 8.4  | 8.9  | 0.6   |
| 129  | GGCCCACTGTAATAGACTCTGGCCCACTGT  | 50               | 3                | 4       | CI      | 10.6 | 14.3 | 3.7   |
| 130  | CGTTTGATGCCTGGGACTCTCGTTTGATGC  | 42               | -4               | 6       | CII     | 17.1 | 14.6 | -2.6  |
| 131  | CCTAGTCACCTATGGACTCTCCTAGTCACC  | 40               | -12              | 4       | NR,CE   | 0.0  | 0.0  | 0.0   |
| 132  | ACACTACGGAGTCAGACTCTACACTACGGA  | 43               | -2               | 8       | NA,LA   | 0.0  | 0.0  | 0.0   |
| 133  | CTGTGCGGTACTTAGACTCTCTGTGCGGTA  | 48               | -8               | 4       | CIII    | 10.6 | 7.8  | -2.8  |
| 134  | TGGTTTCGGCTGTCGACTCTTGGTTTCGGC  | 47               | 24               | 6       | CIII    | 16.7 | 16.2 | -0.5  |
| 135  | TAGCATAGCGGTTTCGACTCTTAGCATAGCG | 43               | -41              | 2       | CIII    | 32.0 | 30.6 | -1.3  |
| 136  | TTTGAGCTACCCGGACTCTTTTGAGCTA    | 38               | 8                | 4       | CII     | 21.4 | 15.5 | -5.8  |
| 137  | TCTGGATCAAGACCGACTCTTCTGGATCAA  | 35               | 6                | 8       | CII     | 42.8 | 31.8 | -11.0 |
| 138  | CCGAGCCGACCGCCGACTCTCCGAGCCGAC  | 52               | -28              | 4       | NA      | 0.0  | 0.0  | 0.0   |
| 139  | TGCTGGTGTTATCGACTCTTGCTGGTGT    | 41               | -25              | 4       | CI      | 10.4 | 12.2 | 1.8   |
| 140  | TAACAGGGAGGTCAGACTCTTAACAGGGAG  | 40               | 6                | 6       | CII     | 26.1 | 17.4 | -8.7  |
| 141  | TCGCCCAACGGTAGACTCTTCGCCCAAC    | 50               | -43              | 4       | CIII    | 26.2 | 30.0 | 3.8   |
| 142  | TCTCTGAACGACGGGACTCTTCTCTGAACG  | 43               | -25              | 2       | CII     | 20.2 | 14.3 | -5.8  |
| 143  | CAGTGCCGATCCCAGACTCTCAGTGCCGAT  | 46               | -110             | 3       | LA      | 0.0  | 0.0  | 0.0   |
| 144  | GTCTACTTCCAGATGACTCTGTCTACTTCC  | 37               | -24              | 3       | CIII    | 21.6 | 22.2 | 0.6   |
| 145  | GTGACGCCCGAAATGACTCTGTGACGCCCG  | 55               | -40              | 2       | CI      | 16.2 | 20.0 | 3.7   |
| 146  | CCATTACGAGCGACGACTCTCCATTACGAG  | 38               | 1                | 4       | CII     | 31.2 | 20.3 | -10.9 |
| 147  | ACACGCGGACTTTAGACTCTACACGCGGAC  | 52               | 18               | 4       | CIII,NA | 33.2 | 44.1 | 10.8  |
| 148  | CCGGCTTACGCCTCGACTCTCCGGCTTACG  | 48               | -4               | 4       | NR,CE   | 0.0  | 0.0  | 0.0   |
| 149  | TTCGGACCTGTGGGGACTCTTTCGGACCTG  | 44               | -37              | 2       | CI      | 7.0  | 8.6  | 1.7   |
| 150  | ACTTTACCTGGTTGACTCTACTTTACCTG   | 36               | 12               | 6       | CIII    | 22.3 | 23.2 | 0.9   |
| 151  | CTGTAACCTCGGGAAGACTCTCTGTAACCTG | 38               | -23              | 6       | SD      | 0.0  | 0.0  | 0.0   |
| 152  | CTGCACCTGGATATGACTCTCTGCACCTGG  | 49               | 4                | 4       | CI      | 8.7  | 10.1 | 1.4   |
| 153  | CAGGAACTTGATTGGACTCTCAGGAACTTG  | 40               | -41              | 4       | CIII    | 14.5 | 13.5 | -1.0  |
| 154  | CCTGCCTCACTAAGACTCTCCTGCCTCAC   | 47               | 17               | 6       | CI      | 21.0 | 26.4 | 5.3   |
| 155  | GATCTCCACCACCCGACTCTGATCTCCACC  | 40               | -40              | 2       | CI      | 12.4 | 17.0 | 4.6   |
| 156  | CCATGACAGGGGACGACTCTCCATGACAGG  | 42               | -7               | 4       | CIII    | 14.9 | 13.2 | -1.7  |

T<sub>M</sub>1: template-trigger T<sub>M</sub> in °C; T<sub>M</sub>2: template-template T<sub>M</sub> in °C; # bonds: number of bonds for template self hybridization. T<sub>M</sub> values and # of bonds determined via the program UnaFold. Results: summary of data analysis and classification results; CI: Class I, well performing; CII: Class II, poorly performing; CIII: Class III, intermediate performance. NR: sequence excluded because not enough replicates of decent quality; CE: Cut End; SD: sequence excluded because standard deviation in P90 or DIFF > 30% of the mean. Additional annotation for sequences with some / all replicates outside of the "normal" expected sigmoidal response. LA: Late Amplification; NA: No Amplification; NS: Non-Sigmoidal. For the 307 sequences with qualified data analysis, P90, N10, and Diff values are listed in minutes.

**Table S1: Template Sequences, Thermodynamic Parameters, and Performance Metrics**

| ID # | Template Sequence               | T <sub>M</sub> 1 | T <sub>M</sub> 2 | # Bonds | Results    | P90  | N10  | DIFF  |
|------|---------------------------------|------------------|------------------|---------|------------|------|------|-------|
| 157  | GGCAACGCCCGCAGGACTCTGGCAACGCC   | 54               | -12              | 3       | CII,NA     | 48.4 | 36.6 | -11.8 |
| 158  | GCGACAAATGGGCGGACTCTGCGACAAATG  | 42               | -34              | 2       | CIII       | 22.2 | 22.9 | 0.8   |
| 159  | ACTCACTTACATCGGACTCTACTCACTTAC  | 36               | -39              | 2       | SD,LA      | 0.0  | 0.0  | 0.0   |
| 160  | TACCCCGCGAAATCGACTCTTACCCCGCGA  | 54               | 15               | 4       | CI         | 6.3  | 8.6  | 2.3   |
| 161  | GTACCTCACCGCGAGACTCTGTACCTCACC  | 41               | 15               | 4       | CI         | 10.4 | 14.2 | 3.8   |
| 162  | CCTCCACTCTGTATGACTCTCCTCCACTCT  | 42               | -68              | 2       | CI         | 6.4  | 9.7  | 3.3   |
| 163  | TCGCAGGATAATTGGACTCTTCGCAGGATA  | 44               | -18              | 4       | CIII       | 17.8 | 18.3 | 0.5   |
| 164  | ACTCGGGGTAAAATGACTCTACTCGGGGTAA | 48               | -13              | 8       | CIII       | 12.4 | 8.3  | -4.1  |
| 165  | GCAGGCTCCTCCCGGACTCTGCAGGCTCCT  | 49               | 8                | 4       | CI         | 11.9 | 14.7 | 2.8   |
| 166  | GGTTAGGTCGATCAGACTCTGGTTAGGTCG  | 43               | 3                | 8       | NR,CE      | 0.0  | 0.0  | 0.0   |
| 167  | ATGAAGTGCCGCCGGACTCTATGAAGTGCC  | 42               | 17               | 6       | CI         | 11.8 | 12.8 | 1.1   |
| 168  | TACCACTCTTGTGGGACTCTTACCACTCTT  | 38               | 24               | 8       | CI         | 19.0 | 25.9 | 6.8   |
| 169  | ATACTCGCCTCGGGGACTCTATACTCGCCT  | 40               | 14               | 8       | CI         | 11.6 | 15.8 | 4.1   |
| 170  | TTCGTGTCTTAGGGGACTCTTTCGTGTCTT  | 36               | -19              | 3       | CIII       | 11.5 | 11.3 | -0.2  |
| 171  | ACCCTGAGACAGGTGACTCTACCCTGAGAC  | 44               | 1                | 4       | CII        | 15.5 | 11.9 | -3.6  |
| 172  | AGGCCAATAAGCCCGACTCTAGGCCAATAA  | 37               | 11               | 4       | CIII       | 34.6 | 34.5 | -0.1  |
| 173  | CCAAATTGGGTCCCGACTCTCCAAATTGGG  | 39               | 21               | 8       | CII,LA     | 42.9 | 30.8 | -12.0 |
| 174  | TAGATTGCATGTATGACTCTTAGATTGCAT  | 36               | -40              | 4       | CII        | 20.2 | 10.5 | -9.7  |
| 175  | GGACCCGCAACCTGGACTCTGGACCCGCAA  | 51               | 4                | 4       | CIII       | 23.3 | 25.8 | 2.5   |
| 176  | GTAATTGCGCCTTCGACTCTGTAATTGCGC  | 42               | 10               | 4       | NS         | 0.0  | 0.0  | 0.0   |
| 177  | AACGAGCCGAGTGGGACTCTAACGAGCCGA  | 49               | -25              | 2       | CIII,NA,LA | 36.8 | 43.4 | 6.6   |
| 178  | TGTAAGGCGTATGGGACTCTTGTAAGGCGT  | 43               | -77              | 4       | CIII       | 8.0  | 8.6  | 0.7   |
| 179  | CGGTATCTGCGCCCGACTCTCGGTATCTGC  | 43               | 10               | 4       | CI         | 18.2 | 23.0 | 4.8   |
| 180  | CAGAATACGACTCAGACTCTCAGAATACGA  | 36               | -25              | 2       | NR,LA      | 0.0  | 0.0  | 0.0   |
| 181  | GGACAAGGGCATCAGACTCTGGACAAGGGC  | 48               | 14               | 8       | CI         | 12.0 | 18.9 | 6.9   |
| 182  | GCTGACAAAGGTGCGACTCTGCTGACAAAG  | 40               | -37              | 8       | CIII       | 9.2  | 9.9  | 0.7   |
| 183  | TCGCCCTCAAAGTAGACTCTTCGCCCTCAA  | 47               | -114             | 3       | CI         | 18.1 | 22.7 | 4.6   |
| 184  | ATGCTACGCTCATTGACTCTATGCTACGCT  | 43               | -44              | 2       | CII        | 30.3 | 24.6 | -5.7  |
| 185  | ATGTGAACCAAGCAGACTCTATGTGAACCA  | 39               | -29              | 2       | CII        | 35.5 | 31.9 | -3.6  |
| 186  | AGCGGCTCCCGGTTGACTCTAGCGGCTCCC  | 54               | 13               | 6       | CIII       | 9.2  | 10.1 | 0.9   |
| 187  | GGGTTTTACCGCTAGACTCTGGGTTTTACC  | 38               | -8               | 4       | CII        | 27.9 | 22.0 | -5.9  |
| 188  | CTCAACGATATCCAGACTCTCTCAACGATA  | 38               | -25              | 2       | CII        | 15.7 | 11.2 | -4.5  |
| 189  | CCATCAGAACGGTAGACTCTCCATCAGAAC  | 38               | -43              | 4       | CIII,NA,LA | 34.2 | 42.1 | 7.9   |
| 190  | GCATCCTCCTTTGCGACTCTGCATCCTCCT  | 43               | -34              | 2       | NR,CE      | 0.0  | 0.0  | 0.0   |
| 191  | GGGAAACTGCATGGGACTCTGGGAAACTGC  | 44               | -43              | 4       | NR,CE      | 0.0  | 0.0  | 0.0   |
| 192  | TTACACGGTTAGTTGACTCTTTACACGGTT  | 36               | -11              | 8       | CI         | 16.8 | 20.0 | 3.3   |
| 193  | CGCTACAGCTATGTGACTCTCGCTACAGCT  | 46               | -34              | 4       | NS         | 0.0  | 0.0  | 0.0   |
| 194  | CCTTGCTGTGACCCGACTCTCCTTGCTGTG  | 45               | -40              | 2       | CI         | 7.6  | 10.7 | 3.1   |
| 195  | GCTTATACGACTAGGACTCTGCTTATACGA  | 37               | -25              | 2       | CII,NA     | 28.6 | 25.0 | -3.7  |

T<sub>M</sub>1: template-trigger T<sub>M</sub> in °C; T<sub>M</sub>2: template-template T<sub>M</sub> in °C; # bonds: number of bonds for template self hybridization. T<sub>M</sub> values and # of bonds determined via the program UnaFold. Results: summary of data analysis and classification results; CI: Class I, well performing; CII: Class II, poorly performing; CIII: Class III, intermediate performance. NR: sequence excluded because not enough replicates of decent quality; CE: Cut End; SD: sequence excluded because standard deviation in P90 or DIFF > 30% of the mean. Additional annotation for sequences with some / all replicates outside of the "normal" expected sigmoidal response. LA: Late Amplification; NA: No Amplification; NS: Non-Sigmoidal. For the 307 sequences with qualified data analysis, P90, N10, and Diff values are listed in minutes.

**Table S1: Template Sequences, Thermodynamic Parameters, and Performance Metrics**

| ID # | Template Sequence                | T <sub>M</sub> 1 | T <sub>M</sub> 2 | # Bonds | Results    | P90  | N10  | DIFF  |
|------|----------------------------------|------------------|------------------|---------|------------|------|------|-------|
| 196  | GTGCAGTCAGATTAGACTCTGTGCAGTCAG   | 45               | 14               | 8       | CIII       | 7.8  | 6.6  | -1.2  |
| 197  | CCACGATCACGTGCGACTCTCCACGATCAC   | 43               | 19               | 6       | CIII,LA    | 32.3 | 32.8 | 0.5   |
| 198  | TCGCCTCTCAACAGGACTCTTCGCCTCTCA   | 46               | -63              | 3       | CI         | 7.9  | 11.7 | 3.8   |
| 199  | CGCTCGGTGACTCCGACTCTCGCTCGGTGA   | 51               | -13              | 3       | CII        | 15.8 | 13.3 | -2.5  |
| 200  | CGCTGAGAACTTGTGACTCTCGCTGAGAAC   | 44               | 19               | 8       | CIII       | 27.0 | 27.3 | 0.3   |
| 201  | GGACGGCTGGATTTGACTCTGGACGGCTGG   | 53               | -13              | 7       | CI         | 14.5 | 20.4 | 5.9   |
| 202  | ATTTACACGCTTGGACTCTATTTACACAG    | 39               | -44              | 2       | SD,NA      | 0.0  | 0.0  | 0.0   |
| 203  | GTCGCTTACCGCCCGACTCTGTCGCTTACC   | 43               | 21               | 8       | CIII,NA,LA | 36.6 | 43.4 | 6.7   |
| 204  | TCTGAAGGGCCCGTACTCTTCTGAAGGGC    | 44               | 25               | 6       | NS         | 0.0  | 0.0  | 0.0   |
| 205  | GATCATCGCACCAGGACTCTGATCATCGCA   | 42               | -10              | 4       | CIII       | 21.7 | 21.7 | 0.0   |
| 206  | TCGGTGTCTCGTCCGCGACTCTTCGGTGTCT  | 49               | 15               | 4       | CI,NA,LA   | 16.6 | 20.2 | 3.7   |
| 207  | GAGATGACGTCTACGACTCTGAGATGACGT   | 36               | 24               | 6       | NS         | 0.0  | 0.0  | 0.0   |
| 208  | TCCTCCTGAATACAGACTCTTCCTCCTGAA   | 39               | 7                | 8       | CII,LA     | 41.2 | 28.7 | -12.5 |
| 209  | GGAGGGTGATAATCGACTCTGGAGGGTGAT   | 43               | 14               | 8       | CIII       | 7.2  | 5.8  | -1.4  |
| 210  | ATCCAACCTTAACAAGACTCTATCCAACCTTA | 36               | -44              | 3       | CII,LA     | 33.0 | 28.3 | -4.7  |
| 211  | GTCACTCCGCACAAGACTCTGTCACTCCGC   | 48               | -116             | 2       | CI         | 13.7 | 18.2 | 4.5   |
| 212  | CGCCCCGACCTTAGCGACTCTCGCCCCGACCT | 55               | 22               | 8       | CI         | 11.0 | 15.1 | 4.1   |
| 213  | TGTTCTCTTCATACGACTCTTGTTCTCTTC   | 36               | -25              | 2       | CI         | 22.0 | 32.1 | 10.1  |
| 214  | AAGAGCTGGTTGTTGACTCTAAGAGCTGGT   | 41               | 14               | 8       | SD         | 0.0  | 0.0  | 0.0   |
| 215  | CTGCCAGCATCCCCGACTCTCTGCCAGCAT   | 46               | -40              | 2       | NR,NA,LA   | 0.0  | 0.0  | 0.0   |
| 216  | TCGTTTTGAGATCAGACTCTTCGTTTTGAG   | 40               | -4               | 4       | CII        | 40.2 | 26.6 | -13.6 |
| 217  | ACTTACCGTTAGGGGACTCTACTTACCGTT   | 38               | -4               | 8       | CI         | 25.3 | 32.5 | 7.3   |
| 218  | AGGTCGGGCAAAGTACTCTAGGTCGGGCA    | 52               | -5               | 5       | CI         | 10.6 | 12.1 | 1.5   |
| 219  | CCGAATACAATGAGGACTCTCCGAATACAA   | 37               | -40              | 2       | LA         | 0.0  | 0.0  | 0.0   |
| 220  | ACGAGTGAATGCCTGACTCTACGAGTGAAT   | 38               | -25              | 2       | CIII,NA,LA | 35.2 | 37.7 | 2.5   |
| 221  | TGCATAGGGGTTTGGACTCTTGCATAGGGG   | 43               | -40              | 4       | CII        | 16.9 | 14.0 | -2.8  |
| 222  | CCGCCAAGGACTACGACTCTCCGCCAAGGA   | 51               | -25              | 2       | CIII       | 10.9 | 8.6  | -2.3  |
| 223  | AGGGGCCGACTCATGACTCTAGGGGCCGAC   | 54               | -8               | 4       | CII        | 21.5 | 18.1 | -3.4  |
| 224  | CGTTTTCCCCTTTGACTCTCGTTTTCCCC    | 44               | -38              | 2       | CI         | 11.6 | 13.5 | 1.9   |
| 225  | CGTTAGGAGCCGGGGACTCTCGTTAGGAGC   | 43               | 8                | 4       | CII        | 22.0 | 19.8 | -2.1  |
| 226  | GTCCTACATAGGGGGACTCTGTCCTACATA   | 36               | 22               | 8       | CII        | 45.0 | 31.0 | -14.0 |
| 227  | TTGACCGTGTCTTCGACTCTTTGACCGTGT   | 43               | -41              | 2       | CI         | 12.5 | 16.7 | 4.2   |
| 228  | CTGATACGGCGGAGGACTCTCTGATACGGC   | 43               | 19               | 4       | CI         | 12.0 | 14.5 | 2.6   |
| 229  | CCGCTATTCTGCCAGACTCTCCGCTATTCT   | 40               | -5               | 6       | CI         | 12.1 | 14.0 | 1.9   |
| 230  | TGGGTGATCAATATGACTCTTGGGTGATCA   | 40               | -8               | 6       | NS         | 0.0  | 0.0  | 0.0   |
| 231  | ATCGTTCTCATAACGACTCTATCGTTCTCA   | 39               | -25              | 3       | CIII       | 29.4 | 33.5 | 4.1   |
| 232  | AGCCCCATGTAAAAGACTCTAGCCCCATGT   | 48               | -116             | 2       | CI         | 11.6 | 14.7 | 3.1   |
| 233  | TGTGAGAAGGGCAGGACTCTTGTGAGAAGG   | 39               | -17              | 3       | CII        | 14.0 | 10.7 | -3.3  |
| 234  | ATACGCTAGAAGTGGACTCTATACGCTAGA   | 38               | -8               | 4       | CII        | 38.4 | 20.6 | -17.8 |

T<sub>M</sub>1: template-trigger T<sub>M</sub> in °C; T<sub>M</sub>2: template-template T<sub>M</sub> in °C; # bonds: number of bonds for template self hybridization. T<sub>M</sub> values and # of bonds determined via the program UnaFold. Results: summary of data analysis and classification results; CI: Class I, well performing; CII: Class II, poorly performing; CIII: Class III, intermediate performance. NR: sequence excluded because not enough replicates of decent quality; CE: Cut End; SD: sequence excluded because standard deviation in P90 or DIFF > 30% of the mean. Additional annotation for sequences with some / all replicates outside of the "normal" expected sigmoidal response. LA: Late Amplification; NA: No Amplification; NS: Non-Sigmoidal. For the 307 sequences with qualified data analysis, P90, N10, and Diff values are listed in minutes.

**Table S1: Template Sequences, Thermodynamic Parameters, and Performance Metrics**

| ID # | Template Sequence              | T <sub>M</sub> 1 | T <sub>M</sub> 2 | # Bonds | Results  | P90  | N10  | DIFF  |
|------|--------------------------------|------------------|------------------|---------|----------|------|------|-------|
| 235  | GCCTTGACTTCGGACTCTGCCTTGACT    | 44               | -43              | 2       | CII,NA   | 15.5 | 12.0 | -3.5  |
| 236  | GGGGGAGCCACGATGACTCTGGGGGAGCCA | 53               | -25              | 2       | NR,SD,NA | 0.0  | 0.0  | 0.0   |
| 237  | CCTGCTTCCCAGTAGACTCTCCTGCTTCCC | 47               | -118             | 3       | CI       | 11.0 | 14.3 | 3.3   |
| 238  | GACATACAGACAATGACTCTGACATACAGA | 35               | -18              | 3       | CII      | 21.2 | 11.5 | -9.7  |
| 239  | AACTCGCCTGCCTAGACTCTAACTCGCCTG | 45               | -12              | 4       | CI       | 13.6 | 17.7 | 4.2   |
| 240  | AGTCCTGCGAGATCGACTCTAGTCCTGCGA | 48               | 14               | 6       | CII      | 16.3 | 13.7 | -2.6  |
| 241  | CAAGCACGCCGTTTACTCTCAAGCACGCC  | 50               | -35              | 6       | CI       | 20.6 | 23.3 | 2.7   |
| 242  | CGGGTTGATGGCGCGACTCTCGGGTTGATG | 44               | 18               | 4       | CI       | 9.8  | 10.9 | 1.0   |
| 243  | TCGCCTTTATCGACGACTCTTCGCCTTTAT | 39               | 4                | 6       | NA       | 0.0  | 0.0  | 0.0   |
| 244  | ACCATCCAGCTACAGACTCTACCATCCAGC | 45               | -34              | 4       | CII,NA   | 16.2 | 14.0 | -2.2  |
| 245  | GACTGCGAAAGTACGACTCTGACTGCGAAA | 43               | -25              | 2       | CI,LA    | 21.4 | 32.2 | 10.8  |
| 246  | GCGGGCTATCGCATGACTCTGCGGGCTATC | 47               | 24               | 8       | CIII,NA  | 11.0 | 10.5 | -0.5  |
| 247  | CGTACCAAGAACCCGACTCTCGTACCAAGA | 41               | -40              | 2       | CII      | 41.5 | 31.1 | -10.5 |
| 248  | GTTTCGCCACCCTAGACTCTGTTTCGCCAC | 45               | -12              | 4       | CI       | 22.1 | 29.0 | 6.9   |
| 249  | TCAGCTTGATTTACGACTCTTCAGCTTGAT | 38               | -64              | 4       | CIII,LA  | 28.0 | 27.0 | -1.0  |
| 250  | TAGCTTGTCGTAGAGACTCTTAGCTTGTCG | 42               | 19               | 8       | CIII     | 29.5 | 29.7 | 0.1   |
| 251  | CGTTAGCCGATCTAGACTCTCGTTAGCCGA | 47               | -4               | 6       | CIII     | 15.0 | 13.8 | -1.2  |
| 252  | GCCGACAAGACTTTGACTCTGCCGACAAGA | 47               | -31              | 6       | CII,NS   | 17.3 | 15.8 | -1.5  |
| 253  | ATGGGTACGGTTGAGACTCTATGGGTACGG | 44               | 9                | 6       | CI       | 8.7  | 10.5 | 1.8   |
| 254  | TCTGTCACACTCAGGACTCTTCTGTCACAC | 41               | -16              | 3       | CIII,LA  | 26.1 | 27.5 | 1.4   |
| 255  | ATCAGGGATTACACGACTCTATCAGGGATT | 36               | -25              | 2       | NR,CE    | 0.0  | 0.0  | 0.0   |
| 256  | ATGTGGGTTTATGAGACTCTATGTGGGTTT | 39               | -86              | 4       | CI       | 9.5  | 11.6 | 2.2   |
| 257  | ATGAGTGGGAAGTGGACTCTATGAGTGGGA | 43               | -12              | 4       | CIII     | 17.0 | 16.1 | -0.9  |
| 258  | GCCCAAATAAAGGGGACTCTGCCCAAATAA | 36               | -11              | 3       | CIII,LA  | 37.0 | 38.1 | 1.1   |
| 259  | GGCTTATGGCGCTTACTCTGGCTTATGGC  | 44               | 14               | 4       | CIII     | 16.0 | 15.2 | -0.8  |
| 260  | GCCGCGATAACGAGGACTCTGCCGCGATAA | 47               | 15               | 4       | CII,LA   | 44.2 | 41.0 | -3.2  |
| 261  | CTGCCCTGACCCACGACTCTCTGCCCTGAC | 47               | -25              | 2       | NA,LA    | 0.0  | 0.0  | 0.0   |
| 262  | AGCCCGGTATGTAGGACTCTAGCCCGGTAT | 47               | 5                | 4       | CII      | 30.0 | 23.1 | -6.9  |
| 263  | AAAGTCAACCAGAAGACTCTAAAGTCAACC | 37               | -25              | 4       | SD,LA    | 0.0  | 0.0  | 0.0   |
| 264  | GAATGCTAGAAAATGACTCTGAATGCTAGA | 36               | -8               | 4       | CII      | 26.6 | 20.3 | -6.3  |
| 265  | AGATGGCTTCACAAGACTCTAGATGGCTTC | 39               | -13              | 4       | CIII     | 10.4 | 10.5 | 0.2   |
| 266  | TAGACTAGATGGGACTCTTAGACTAG     | 36               | -3               | 4       | CII      | 19.7 | 7.2  | -12.5 |
| 267  | GGGGCTACTACTGGGACTCTGGGGCTACTA | 45               | -36              | 8       | CIII,NA  | 9.7  | 9.0  | -0.7  |
| 268  | TCATTGGGATTATTGACTCTTCATTGGGAT | 37               | -307             | 2       | SD,LA    | 0.0  | 0.0  | 0.0   |
| 269  | AGTTTGGCAGCTTAGACTCTAGTTTGGCAG | 42               | -64              | 4       | CII      | 19.3 | 17.0 | -2.2  |
| 270  | CGATCCGCTGTAGGGACTCTCGATCCGCTG | 48               | -41              | 2       | CI       | 16.4 | 18.3 | 1.9   |
| 271  | TCCAATCGTCGACACTCTTCCAATCGT    | 43               | -120             | 2       | LA       | 0.0  | 0.0  | 0.0   |
| 272  | AAGCAACGAGTACAGACTCTAAGCAACGAG | 41               | -25              | 2       | CII      | 34.0 | 29.0 | -5.0  |
| 273  | GGATACGTCTGGGTGACTCTGGATACGTCT | 39               | -18              | 4       | CI       | 20.1 | 23.7 | 3.6   |

T<sub>M</sub>1: template-trigger T<sub>M</sub> in °C; T<sub>M</sub>2: template-template T<sub>M</sub> in °C; # bonds: number of bonds for template self hybridization. T<sub>M</sub> values and # of bonds determined via the program UnaFold. Results: summary of data analysis and classification results; CI: Class I, well performing; CII: Class II, poorly performing; CIII: Class III, intermediate performance. NR: sequence excluded because not enough replicates of decent quality; CE: Cut End; SD: sequence excluded because standard deviation in P90 or DIFF > 30% of the mean. Additional annotation for sequences with some / all replicates outside of the "normal" expected sigmoidal response. LA: Late Amplification; NA: No Amplification; NS: Non-Sigmoidal. For the 307 sequences with qualified data analysis, P90, N10, and Diff values are listed in minutes.

**Table S1: Template Sequences, Thermodynamic Parameters, and Performance Metrics**

| ID # | Template Sequence               | T <sub>M</sub> 1 | T <sub>M</sub> 2 | # Bonds | Results | P90  | N10  | DIFF  |
|------|---------------------------------|------------------|------------------|---------|---------|------|------|-------|
| 274  | ACAGCCGTGCCCAAGACTCTACAGCCGTGC  | 52               | -116             | 2       | CI      | 17.5 | 22.7 | 5.2   |
| 275  | GTCGACTAATGCCAGACTCTGTGCGACTAAT | 35               | 24               | 6       | NA,LA   | 0.0  | 0.0  | 0.0   |
| 276  | GCTTAGAGCTCGCTGACTCTGCTTAGAGCT  | 38               | 13               | 6       | NS      | 0.0  | 0.0  | 0.0   |
| 277  | TGCATTGGAGCCTTGACTCTTGCATTGGAG  | 40               | -40              | 4       | CII     | 37.9 | 32.5 | -5.4  |
| 278  | CGACAACCTCTAATGACTCTCGACAACCTC  | 37               | -41              | 2       | CI      | 25.2 | 37.1 | 11.9  |
| 279  | CAGCGGCCAAACAAGACTCTCAGCGGCCAA  | 52               | 9                | 4       | CIII    | 27.0 | 29.0 | 2.0   |
| 280  | TCATAGCTCACTGGGACTCTTCATAGCTCA  | 35               | -24              | 4       | CII     | 23.2 | 19.6 | -3.6  |
| 281  | CGGAAGGGACAGTTGACTCTCGGAAGGGAC  | 47               | -42              | 8       | CII     | 19.1 | 17.4 | -1.8  |
| 282  | CCTCCCAGTAGCTAGACTCTCCTCCCAGTA  | 44               | -5               | 4       | CIII    | 13.6 | 11.5 | -2.1  |
| 283  | GCATACAGCATCAGGACTCTGCATACAGCA  | 42               | -43              | 4       | CII     | 21.1 | 13.9 | -7.3  |
| 284  | ATACCTACGAATAAGACTCTATACCTACGA  | 37               | -25              | 2       | CII     | 36.4 | 29.5 | -6.9  |
| 285  | AGACCTCCCAAGCCGACTCTAGACCTCCCA  | 45               | -13              | 4       | CIII    | 27.8 | 32.2 | 4.4   |
| 286  | ATCGCCCGATGATTGACTCTATCGCCCGAT  | 49               | 12               | 8       | CII     | 37.7 | 27.0 | -10.6 |
| 287  | TGCGTTTTGTGCCAGACTCTTGCGTTTTGT  | 42               | -120             | 2       | CIII    | 23.3 | 27.3 | 4.0   |
| 288  | ACAGAGCTTGCATGGACTCTACAGAGCTTG  | 41               | -45              | 4       | CII     | 17.2 | 13.0 | -4.2  |
| 289  | GATCGTGACTTCTAGACTCTGATCGTGACT  | 37               | -13              | 4       | CI      | 15.8 | 18.0 | 2.2   |
| 290  | ACGGAGCAAATGCAGACTCTACGGAGCAAA  | 45               | 16               | 6       | CI      | 15.7 | 19.4 | 3.7   |
| 291  | TTCGCTTCAGATGGGACTCTTTCGCTTCAG  | 43               | -120             | 2       | CII     | 22.3 | 15.6 | -6.7  |
| 292  | TGATGACCCCTATGGACTCTTGATGACCCC  | 43               | -42              | 2       | CI      | 7.7  | 12.1 | 4.4   |
| 293  | GTTATCCAGCTAGTGACTCTGTTATCCAGC  | 38               | -34              | 4       | CII     | 11.9 | 6.7  | -5.3  |
| 294  | CACTGTGCTACAAGGACTCTCACTGTGCTA  | 43               | 9                | 6       | CIII    | 13.1 | 11.7 | -1.5  |
| 295  | CGATGATAACATCCGACTCTCGATGATAAC  | 35               | -8               | 4       | CII,LA  | 45.1 | 40.1 | -5.0  |
| 296  | ATGACTCAGTAAGTGACTCTATGACTCAGT  | 36               | -58              | 6       | CII     | 38.4 | 23.9 | -14.5 |
| 297  | TTGGGAGCCCGTTAGACTCTTTGGGAGCCC  | 48               | 5                | 8       | NR,CE   | 0.0  | 0.0  | 0.0   |
| 298  | ACCACATAACATTTCGACTCTACCACATAAC | 37               | -41              | 2       | CIII    | 30.9 | 32.4 | 1.6   |
| 300  | ATGCTCCAATACGGGACTCTATGCTCCAAT  | 39               | -42              | 2       | CIII    | 22.9 | 22.8 | -0.1  |
| 299  | CATACGGACTGAGTGACTCTCATACGGACT  | 39               | 22               | 8       | NR,LA   | 0.0  | 0.0  | 0.0   |
| 301  | TAGAACGGTGTGTTGGACTCTTAGAACGGTG | 41               | -38              | 4       | CIII    | 21.6 | 24.4 | 2.8   |
| 302  | GCTTATGTCTGAGCGACTCTGCTTATGTCT  | 35               | -65              | 4       | CI      | 18.2 | 23.0 | 4.9   |
| 303  | TCCTGCTCGTAATTGACTCTTCCTGCTCGT  | 48               | -18              | 4       | CI      | 7.1  | 13.7 | 6.6   |
| 304  | TGGGGGTCGAGACAGACTCTTGGGGGTCGA  | 50               | -41              | 2       | NR,NS   | 0.0  | 0.0  | 0.0   |
| 305  | CGATCGTCCGACGTGACTCTCGATCGTCCG  | 50               | 22               | 6       | CIII    | 33.3 | 34.5 | 1.2   |
| 306  | CCGCAGCATTTACAGACTCTCCGCAGCATT  | 49               | -7               | 4       | CI      | 18.5 | 27.2 | 8.8   |
| 307  | GAATCCGCTTTGCCGACTCTGAATCCGCTT  | 42               | -40              | 2       | CI,NA   | 24.4 | 31.2 | 6.8   |
| 308  | ACGTGCTGCCCAACGACTCTACGTGCTGCC  | 52               | 0                | 4       | CI      | 24.7 | 31.4 | 6.8   |
| 309  | AGACAGACAACGAAGACTCTAGACAGACAA  | 38               | -25              | 2       | NA,LA   | 0.0  | 0.0  | 0.0   |
| 310  | AAGATCATGCAATAGACTCTAAGATCATGC  | 37               | -20              | 4       | CII     | 24.5 | 18.7 | -5.8  |
| 311  | AGTCCGTTAAATCTGACTCTAGTCCGTTAA  | 37               | -18              | 4       | CII     | 28.0 | 17.2 | -10.8 |
| 312  | AATCAACGTCTGATGACTCTAATCAACGTC  | 37               | -62              | 4       | NA      | 0.0  | 0.0  | 0.0   |

T<sub>M</sub>1: template-trigger T<sub>M</sub> in °C; T<sub>M</sub>2: template-template T<sub>M</sub> in °C; # bonds: number of bonds for template self hybridization. T<sub>M</sub> values and # of bonds determined via the program UnaFold. Results: summary of data analysis and classification results; CI: Class I, well performing; CII: Class II, poorly performing; CIII: Class III, intermediate performance. NR: sequence excluded because not enough replicates of decent quality; CE: Cut End; SD: sequence excluded because standard deviation in P90 or DIFF > 30% of the mean. Additional annotation for sequences with some / all replicates outside of the "normal" expected sigmoidal response. LA: Late Amplification; NA: No Amplification; NS: Non-Sigmoidal. For the 307 sequences with qualified data analysis, P90, N10, and Diff values are listed in minutes.

**Table S1: Template Sequences, Thermodynamic Parameters, and Performance Metrics**

| ID # | Template Sequence                | T <sub>M</sub> 1 | T <sub>M</sub> 2 | # Bonds | Results   | P90  | N10  | DIFF  |
|------|----------------------------------|------------------|------------------|---------|-----------|------|------|-------|
| 313  | GTAAGGTTCACTATGACTCTGTAAGGTTCA   | 35               | -75              | 2       | CII       | 30.1 | 24.0 | -6.2  |
| 314  | TTCCCATGTAGAGCGACTCTTCCCATGTA    | 37               | -17              | 4       | CIII,NA   | 26.5 | 29.4 | 2.9   |
| 315  | GACATCTCTACGTGACTCTGACATCTCT     | 35               | 0                | 4       | CI,NS     | 17.1 | 25.4 | 8.3   |
| 316  | GACACCCTTGTGCCGACTCTGACACCCTTG   | 42               | -40              | 2       | CIII,LA   | 33.8 | 38.2 | 4.4   |
| 317  | GACCGAGTAGATCTGACTCTGACCGAGTAG   | 41               | 13               | 6       | CII       | 34.9 | 30.2 | -4.8  |
| 318  | GATGTTTGGAGCTTGACTCTGATGTTTGGGA  | 38               | -45              | 4       | SD        | 0.0  | 0.0  | 0.0   |
| 319  | ACCTAGCCTCGGTTGACTCTACCTAGCCTC   | 41               | -31              | 3       | CIII      | 14.9 | 13.9 | -1.0  |
| 320  | CAGTGTCCC CGATGACTCTCAGTGTCCC    | 47               | 15               | 4       | CI        | 11.0 | 15.3 | 4.4   |
| 321  | TCACGAATCCATTAGACTCTTCACGAATCC   | 43               | -25              | 2       | CI        | 14.2 | 17.6 | 3.4   |
| 322  | CCCTACGCTAGTTAGACTCTCCCTACGCTA   | 46               | -88              | 3       | CIII      | 10.0 | 10.4 | 0.5   |
| 323  | CCTATCCTGACCGCGACTCTCCTATCCTGA   | 38               | 15               | 4       | CIII      | 23.4 | 24.3 | 0.9   |
| 324  | ACGTTGGGCCTATGACTCTACGTTGGGC     | 51               | 7                | 4       | CIII      | 11.2 | 10.5 | -0.7  |
| 325  | CATGCCTGATCTCGGACTCTCATGCCTGAT   | 40               | -20              | 4       | CII       | 32.0 | 20.5 | -11.5 |
| 326  | AGGGGAACCGAACAGACTCTAGGGGAACCG   | 50               | -4               | 8       | CI        | 17.0 | 19.9 | 2.9   |
| 327  | GATGGACGAACTCTGACTCTGATGGACGAA   | 41               | -25              | 2       | CI        | 13.4 | 19.0 | 5.6   |
| 328  | TGAACGCCAGTACAGACTCTTGAACGCCAG   | 46               | -4               | 4       | CIII      | 33.4 | 33.0 | -0.4  |
| 329  | ACAAAGCCTTTCTGGACTCTACAAAGCCTT   | 40               | -27              | 8       | NR,LA     | 0.0  | 0.0  | 0.0   |
| 330  | GCTGGTCCCATGCTGACTCTGCTGGTCCCA   | 49               | -20              | 4       | SD,NA,LA  | 0.0  | 0.0  | 0.0   |
| 331  | AAGAAAACGGTACTGACTCTAAGAAAACGG   | 36               | 16               | 8       | NA        | 0.0  | 0.0  | 0.0   |
| 332  | AGTCTTGCTCGCCGACTCTAGTCTTGCTC    | 39               | 12               | 4       | CI        | 24.7 | 34.7 | 10.0  |
| 333  | TGGTGC GACTGTGTGACTCTTGGTGC GACT | 48               | -34              | 2       | CI        | 8.6  | 10.7 | 2.1   |
| 334  | GATTGCCCGAGTAGACTCTGATTGCCCG     | 50               | -16              | 4       | CIII      | 11.3 | 11.6 | 0.4   |
| 335  | CCATCATGTAATCCGACTCTCCATCATGTA   | 37               | -40              | 2       | CIII      | 20.4 | 22.5 | 2.1   |
| 336  | AAAGGTTT GACTGGACTCTAAAGGTTTGC   | 39               | -40              | 4       | CIII      | 24.5 | 23.3 | -1.2  |
| 337  | CCGCATCATATCCCGACTCTCCGCATCATA   | 44               | -40              | 2       | CI        | 10.7 | 16.1 | 5.3   |
| 338  | TAAACCGACTGTCCGACTCTTAAACCGACT   | 40               | 8                | 6       | NR,LA     | 0.0  | 0.0  | 0.0   |
| 339  | GATGACCGCCTTAGACTCTGATGACCGCC    | 47               | -13              | 4       | CI        | 12.7 | 17.8 | 5.1   |
| 340  | ACTCTCCTGCTGTGACTCTACTCTCCTGC    | 44               | 24               | 6       | CIII      | 14.3 | 14.1 | -0.2  |
| 341  | TGGGATCGGCTATTGACTCTTGGGATCGGC   | 49               | -27              | 4       | CIII      | 9.3  | 9.8  | 0.5   |
| 342  | CTGGGGTAAACTTGGACTCTCTGGGGTAAA   | 39               | -72              | 4       | CI        | 17.6 | 18.9 | 1.2   |
| 343  | ACATCGACGCCTCAGACTCTACATCGACGC   | 47               | -25              | 4       | CI        | 22.2 | 30.8 | 8.6   |
| 344  | TCAGAAGACTAACC GACTCTTCAGAAGACT  | 37               | 21               | 8       | CII,LA    | 35.4 | 27.8 | -7.6  |
| 345  | AGCAGCGGAGACAGGACTCTAGCAGCGGAG   | 52               | 8                | 7       | CIII      | 29.6 | 31.7 | 2.1   |
| 346  | GGTCGTTTGT TACTGACTCTGGTCGTTTGT  | 41               | -34              | 4       | CI        | 13.8 | 19.9 | 6.2   |
| 347  | GACCAAGTCGTGGT GACTCTGACCAAGTCG  | 43               | 0                | 9       | NR,CE     | 0.0  | 0.0  | 0.0   |
| 348  | TCGATCAGTAACCGGACTCTTCGATCAGTA   | 38               | 16               | 4       | CII,NA,LA | 28.6 | 23.1 | -5.5  |
| 349  | CAAACGCGACGGTAGACTCTCAAACGCGAC   | 46               | 22               | 2       | NR,NA,LA  | 0.0  | 0.0  | 0.0   |
| 350  | AATTCCCCTGGCTGGACTCTAATTCCCCTG   | 39               | -17              | 4       | CI        | 27.7 | 38.1 | 10.4  |
| 351  | ATATCCGTCAGAACGACTCTATATCCGTC    | 38               | -49              | 3       | CIII      | 35.6 | 41.4 | 5.8   |

T<sub>M</sub>1: template-trigger T<sub>M</sub> in °C; T<sub>M</sub>2: template-template T<sub>M</sub> in °C; # bonds: number of bonds for template self hybridization. T<sub>M</sub> values and # of bonds determined via the program UnaFold. Results: summary of data analysis and classification results; CI: Class I, well performing; CII: Class II, poorly performing; CIII: Class III, intermediate performance. NR: sequence excluded because not enough replicates of decent quality; CE: Cut End; SD: sequence excluded because standard deviation in P90 or DIFF > 30% of the mean. Additional annotation for sequences with some / all replicates outside of the "normal" expected sigmoidal response. LA: Late Amplification; NA: No Amplification; NS: Non-Sigmoidal. For the 307 sequences with qualified data analysis, P90, N10, and Diff values are listed in minutes.

**Table S1: Template Sequences, Thermodynamic Parameters, and Performance Metrics**

| ID # | Template Sequence                | T <sub>M</sub> 1 | T <sub>M</sub> 2 | # Bonds | Results  | P90  | N10  | DIFF  |
|------|----------------------------------|------------------|------------------|---------|----------|------|------|-------|
| 352  | TCGGTTGCTTAATAGACTCTTCGGTTGCTT   | 46               | -71              | 2       | CI       | 8.3  | 11.3 | 3.0   |
| 353  | ACACTTGTACCTTAGACTCTACACTTGTAC   | 36               | -13              | 4       | CII      | 28.9 | 17.7 | -11.2 |
| 354  | AAGTTGGCCCGAGAGACTCTAAGTTGGCCC   | 44               | 19               | 8       | CIII     | 16.6 | 15.9 | -0.7  |
| 355  | TTGCCTGGTAGTTAGACTCTTTGCCTGGTA   | 43               | -21              | 6       | CI       | 15.0 | 18.9 | 4.0   |
| 356  | CTCACGCTACGGACGACTCTCTCACGCTAC   | 43               | 2                | 4       | CI       | 23.0 | 35.9 | 12.9  |
| 357  | CCTCCTGTGACTCGGACTCTCCTCCTGTGA   | 44               | -47              | 2       | CI       | 14.2 | 16.9 | 2.8   |
| 358  | TGCGGACCTCCTGTGACTCTTGCGGACCTC   | 48               | -39              | 2       | CI       | 10.2 | 13.2 | 3.0   |
| 359  | TAGAGCATGTTTCTGACTCTTAGAGCATGT   | 39               | 18               | 8       | CII      | 16.6 | 14.7 | -1.9  |
| 360  | GTGGTGAAGGGCGTGACTCTGTGGTGAAGG   | 42               | -77              | 4       | CI       | 6.5  | 8.0  | 1.5   |
| 361  | CGGGAAAATGTACCAGACTCTCGGGAAAATGT | 42               | -40              | 6       | CIII     | 13.9 | 14.2 | 0.3   |
| 362  | TGATTCCCGCACCTGACTCTTGATTCCCGC   | 47               | -31              | 2       | CI       | 15.1 | 19.6 | 4.6   |
| 363  | GTACGGTAGGTGGGGACTCTGTACGGTAGG   | 41               | 7                | 8       | CII      | 25.6 | 21.2 | -4.3  |
| 364  | AGCGCAGTTGAATAGACTCTAGCGCAGTTG   | 50               | 18               | 4       | CIII,LA  | 35.1 | 34.2 | -1.0  |
| 365  | TCTGCGAATGGGGTGACTCTTCTGCGAATG   | 43               | -34              | 2       | CII      | 19.9 | 16.5 | -3.4  |
| 366  | GGCACTTAAAAGCGGACTCTGGCACTTAAA   | 37               | -36              | 4       | CII      | 26.9 | 18.4 | -8.5  |
| 367  | CTTCTGTCTAACGCGACTCTTCTGTCTA     | 36               | 22               | 4       | SD       | 0.0  | 0.0  | 0.0   |
| 368  | CCGCTATGTTGAACGACTCTCCGCTATGTT   | 41               | -25              | 2       | CI       | 11.1 | 12.3 | 1.2   |
| 369  | GATGATCCGACTAAGACTCTGATGATCCGA   | 41               | -40              | 2       | CII      | 18.4 | 13.4 | -4.9  |
| 370  | ACAAATGCGTAAACGACTCTACAAATGCGT   | 42               | 16               | 6       | CII      | 25.4 | 23.4 | -2.0  |
| 371  | GAACCCCGTTGCGGACTCTGAACCCCGT     | 49               | 15               | 6       | CI       | 17.8 | 28.7 | 10.9  |
| 372  | AACGTTCAGTAGTAGACTCTAACGTTCAGT   | 39               | 11               | 6       | NA,NS    | 0.0  | 0.0  | 0.0   |
| 373  | AGAACCAGACCAATGACTCTAGAACCAGAC   | 40               | -13              | 4       | LA       | 0.0  | 0.0  | 0.0   |
| 374  | CCCCTTCTAGTAACGACTCTCCCCTTCTAG   | 39               | -25              | 2       | CIII     | 7.2  | 5.2  | -2.0  |
| 375  | TTGGAACGAGTGCTGACTCTTTGGAACGAG   | 40               | -25              | 2       | CII      | 24.3 | 19.7 | -4.6  |
| 376  | ATTGCACAACGGTGGACTCTATTGCACAAC   | 40               | 13               | 6       | CI       | 23.0 | 28.7 | 5.7   |
| 377  | TAACTACGGCGGTTGACTCTTAACACGGC    | 40               | 19               | 4       | CII      | 26.5 | 19.8 | -6.7  |
| 378  | AACCGTACAAACAGGACTCTAACCGTACAA   | 36               | -6               | 4       | NR,LA    | 0.0  | 0.0  | 0.0   |
| 379  | ATTAGCCAGCCGATGACTCTATTAGCCAGC   | 41               | -40              | 2       | CIII     | 11.5 | 12.4 | 0.8   |
| 380  | GTAGGCGATGATGAGACTCTGTAGGCGATG   | 44               | -34              | 2       | CI       | 9.0  | 11.1 | 2.2   |
| 381  | TCATGGACATCTGCGACTCTTCATGGACAT   | 37               | -34              | 2       | NR,NA,LA | 0.0  | 0.0  | 0.0   |
| 382  | GCGTTCTAACACGCGACTCTGCGTTCTAAC   | 41               | 22               | 4       | NA,LA    | 0.0  | 0.0  | 0.0   |
| 383  | ACCAAAGGCTAGCGACTCTACCAAAGGC     | 43               | 14               | 6       | CII      | 30.3 | 27.0 | -3.2  |
| 384  | GCCCTCACATTTACGACTCTGCCCTCACAT   | 45               | -25              | 2       | CI       | 12.8 | 15.4 | 2.6   |

T<sub>M</sub>1: template-trigger T<sub>M</sub> in °C; T<sub>M</sub>2: template-template T<sub>M</sub> in °C; # bonds: number of bonds for template self hybridization. T<sub>M</sub> values and # of bonds determined via the program UnaFold. Results: summary of data analysis and classification results; CI: Class I, well performing; CII: Class II, poorly performing; CIII: Class III, intermediate performance. NR: sequence excluded because not enough replicates of decent quality; CE: Cut End; SD: sequence excluded because standard deviation in P90 or DIFF > 30% of the mean. Additional annotation for sequences with some / all replicates outside of the "normal" expected sigmoidal response. LA: Late Amplification; NA: No Amplification; NS: Non-Sigmoidal. For the 307 sequences with qualified data analysis, P90, N10, and Diff values are listed in minutes.
